# Supplementary material
Source: PubMed Central journal article supplement (PMC8041360)
Supplement: mmc1.pdf [file mmc1.pdf]

# THE LANCET

## Global Health

### Supplementary appendix 1

This translation in Portuguese was submitted by the authors and we reproduce it as supplied. It has not been peer reviewed. The Lancet's editorial processes have only been applied to the original in English, which should serve as reference for this manuscript.

Esta tradução em português foi submetida pelos autores e nós não fizemos quaisquer alterações. Esta versão não foi revista por pares. O processo editorial do The Lancet só foi aplicado à versão original em inglês, que deve servir como referência para este artigo.

Supplement to: Rocha R, Atun R, Massuda A, et al. Effect of socioeconomic inequalities and vulnerabilities on health-system preparedness and response to COVID-19 in Brazil: a comprehensive analysis. *Lancet Glob Health* 2021; published online April 12. [http://dx.doi.org/10.1016/S2214-109X\(21\)00081-4](http://dx.doi.org/10.1016/S2214-109X(21)00081-4).

## **Resumo**

**Contexto:** O Brasil experimentou uma disseminação rápida da COVID-19 apesar de ter sistemas de saúde e proteção social bem estabelecidos. Entender a relação entre o nível de preparo do sistema de saúde, a resposta à COVID-19, e o padrão da disseminação da pandemia é particularmente importante em um país tão marcado por desigualdades socioeconômicas (e.g., habitacional e no mercado de trabalho) e outros riscos sanitários (estrutura etária e carga de doenças crônicas).

**Métodos:** A partir de diversas fontes públicas no Brasil, obtivemos dados sobre fatores de risco sanitários para a COVID-19 (proporção da população com doenças crônicas e proporção acima de 60 anos), vulnerabilidade socioeconômica (proporção da população com vulnerabilidade habitacional e proporção de trabalhadores informais), capacidade do sistema de saúde (número de leitos de UTI e médicos), cobertura da atenção primária e assistência social, mortes por COVID-19, e respostas dos governos estaduais em termos de políticas de distanciamento físico. Também obtivemos dados sobre a proporção da população permanecendo em casa, baseada em dados geolocalizados, como medida de adesão ao distanciamento físico. Desenvolvemos um índice de vulnerabilidade socioeconômica (SVI) a partir de características individuais, domiciliares, e do Índice de Desenvolvimento Humano. Conduzimos análises nos níveis estadual e municipal. Usamos estatísticas descritivas e correlações entre indicadores estaduais para caracterizar a relação entre a disponibilidade de recursos de saúde e características socioeconômicas, e a disseminação da pandemia e resposta dos governos e da população em termos de novos investimentos, legislação, e distanciamento físico. Usamos regressões lineares em um painel mensal municipal de fevereiro a outubro de 2020 para caracterizar a dinâmica da mortalidade por COVID-19 e a resposta à pandemia dos municípios.

**Resultados:** A disseminação inicial da COVID-19 foi em maior parte influenciada por padrões de vulnerabilidade socioeconômica, medida pelo índice de vulnerabilidade socioeconômica, ao invés de estrutura etária ou prevalência de fatores de risco de saúde. Os estados com alta (acima da média) vulnerabilidade socioeconômica (SVI) ampliaram suas capacidades hospitalares, publicaram legislação mais rigorosa relacionada à COVID-19, e registraram maiores aumentos na adesão ao distanciamento físico, ainda que não suficientemente para prevenir mortalidade por COVID-19 mais alta durante a fase inicial da pandemia, comparados a estados com SVI mais baixo. Taxas de mortalidade aceleraram até junho, em particular em municípios com maior

vulnerabilidade socioeconômica. Durante os meses seguintes, diferenças em políticas de resposta convergiram em municípios com menor e maior vulnerabilidade socioeconômica, enquanto o distanciamento físico permaneceu relativamente alto e taxas de mortalidade relativamente mais baixas nos municípios mais vulneráveis socioeconomicamente.

**Interpretação:** No Brasil, desigualdades socioeconômicas, ao invés de idade, estado de saúde, e outros fatores de risco para a COVID-19, afetaram o curso da pandemia, com uma carga desproporcionalmente adversa em estados e municípios com maior vulnerabilidade socioeconômica. A resposta de governos locais e o comportamento da população em estados e municípios mais vulneráveis socioeconomicamente contribuíram para conter os efeitos da pandemia. Políticas e ações focalizadas são necessárias para proteger aqueles com maior vulnerabilidade socioeconômica. Esta experiência pode ser relevante em outros países de baixa e média renda (LMICs), onde níveis de vulnerabilidade socioeconômica variam muito.

**Financiamento:** Não há.
